# Supplementary material for: Tensile straining of iridium sites in manganese oxides for proton-exchange membrane water electrolysers
Source: PubMed Central journal article supplement (PMC10762142; doi:10.1038/s41467-023-44483-6), 2024-01-02
Supplement: 41467_2023_44483_MOESM1_ESM.pdf [file 41467_2023_44483_MOESM1_ESM.pdf]

## Supplementary Information for

### Tensile straining of iridium sites in manganese oxides for proton-exchange membrane water electrolyzers

Hui Su,<sup>1,5,\*</sup> Chenyu Yang,<sup>2,5</sup> Meihuan Liu,<sup>3</sup> Xu Zhang,<sup>4</sup> Wanlin Zhou,<sup>2</sup> Yuhao Zhang,<sup>2</sup> Kun Zheng,<sup>4</sup> Shixun Lian,<sup>1,\*</sup> and Qinghua Liu<sup>2,\*</sup>

<sup>1</sup>Key Laboratory of Light Energy Conversion Materials of Hunan Province College, College of Chemistry and Chemical Engineering, Hunan Normal University, Changsha 410081, Hunan, China

<sup>2</sup>National Synchrotron Radiation Laboratory, University of Science and Technology of China, Hefei 230029, Anhui, China

<sup>3</sup> State Key Laboratory for Powder Metallurgy, Central South University, Changsha 410083, Hunan, China

<sup>4</sup>Beijing Key Laboratory of Microstructure and Properties of Solids, Faculty of Materials and Manufacturing, Beijing University of Technology, Beijing, 100124, China

<sup>5</sup> These authors contributed equally: Hui Su, Chenyu Yang.

\*E-mail: suhui@hunnu.edu.cn; sxlian@hunnu.edu.cn; qhliu@ustc.edu.cn

#### Contents:

Supplementary Figs. 1-32;

Supplementary Tables 1-7;

Supplementary references 1-20.

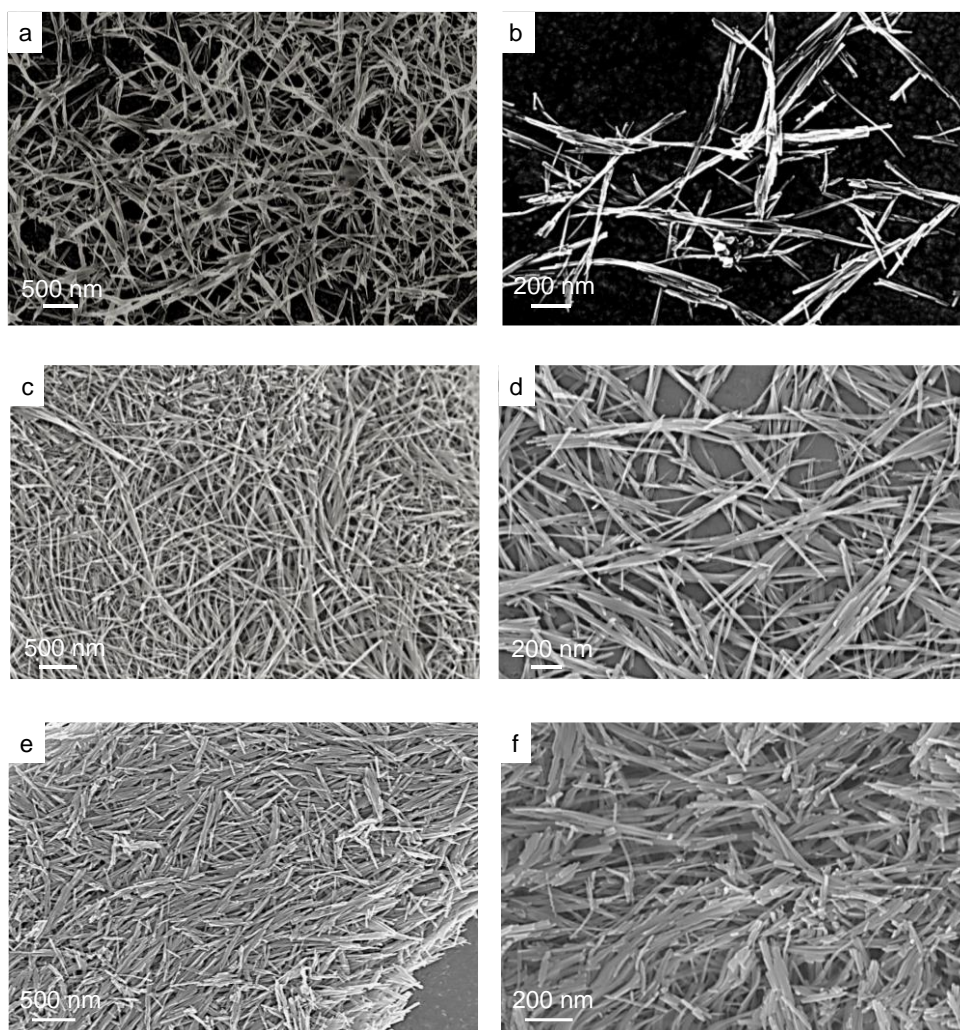

**Supplementary Fig. 1** SEM images of (a) and (b) MnO<sub>2</sub>, (c) and (d) Ir-MnO<sub>2</sub>, (e) and (f) TS-Ir/MnO<sub>2</sub>.

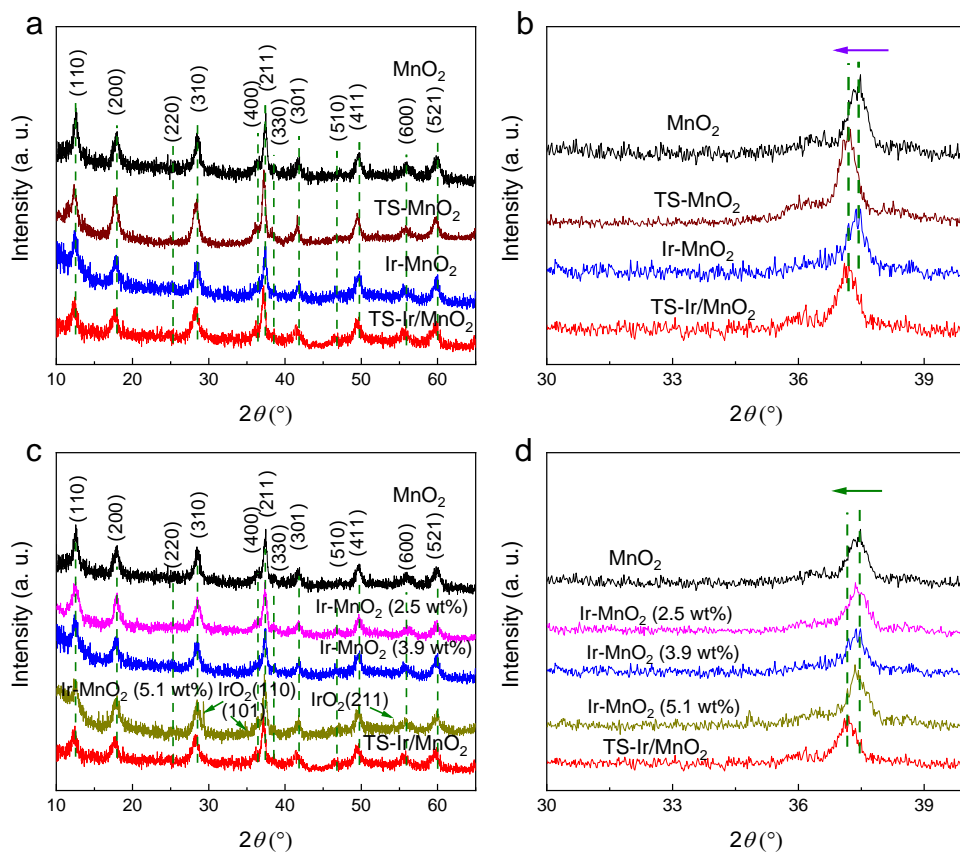

**Supplementary Fig. 2** (a) and (b) XRD patterns for  $\text{TS-Ir/MnO}_2$ ,  $\text{Ir-MnO}_2$  and  $\text{MnO}_2$  electrocatalysts. (c) and (d) XRD patterns for  $\text{MnO}_2$ ,  $\text{Ir-MnO}_2$  (2.5 wt%, 3.9 wt% and 5.1 wt%) and  $\text{TS-Ir/MnO}_2$  electrocatalysts.

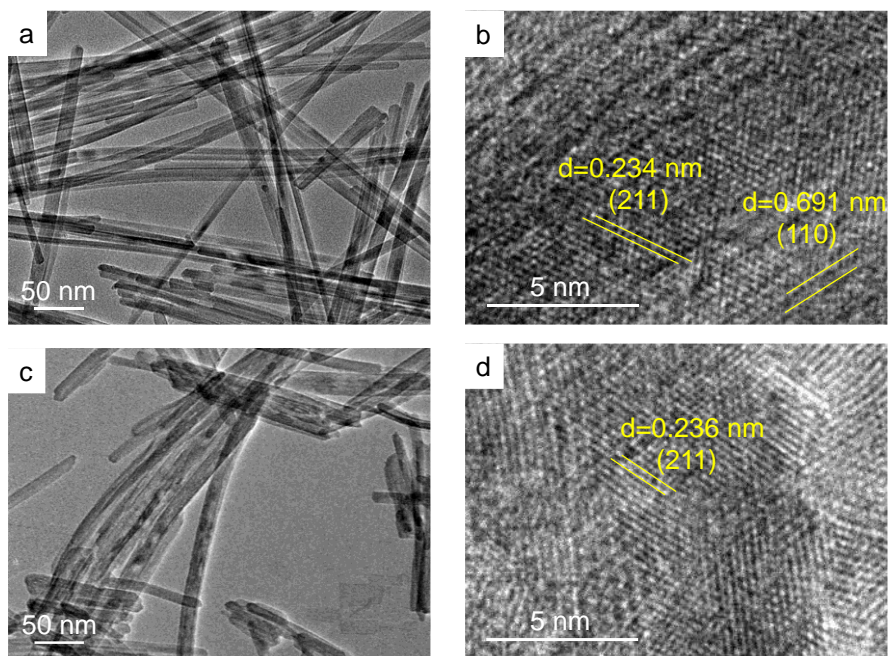

**Supplementary Fig. 3** (a) TEM and (b) HRTEM images of MnO<sub>2</sub>. (c) TEM and (b) HRTEM images of Ir-MnO<sub>2</sub>.

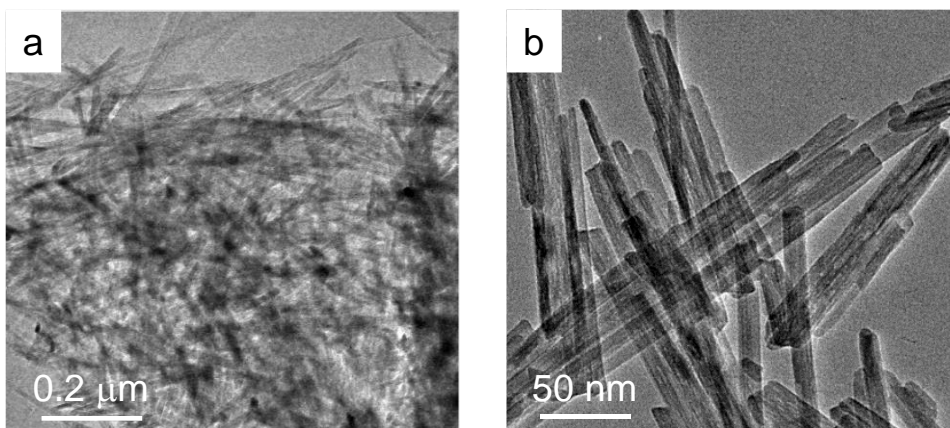

**Supplementary Fig. 4** (a) and (b) TEM images of TS-Ir/MnO<sub>2</sub>.

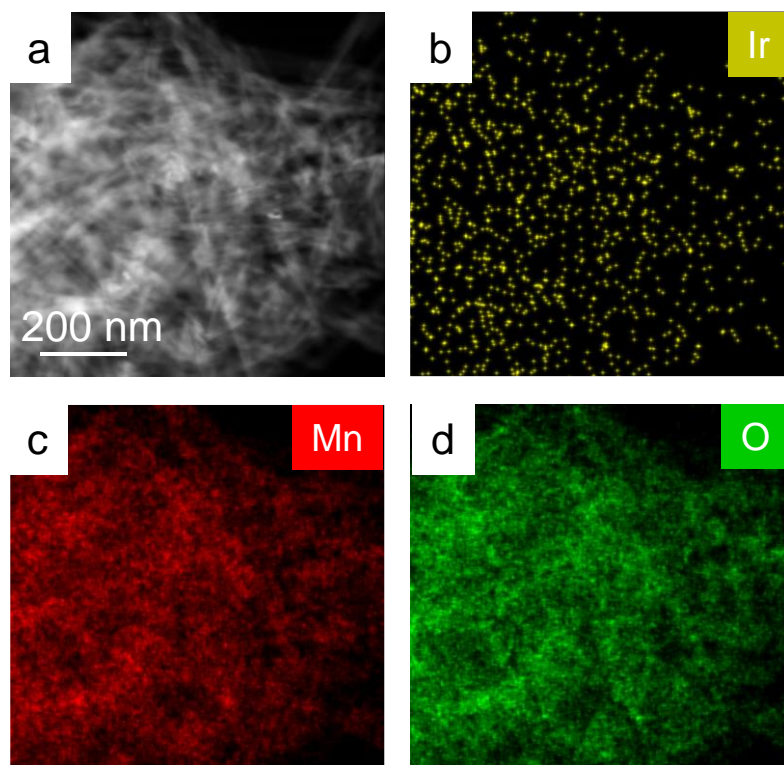

**Supplementary Fig. 5** STEM-EDS mapping images for TS-Ir/MnO<sub>2</sub>.

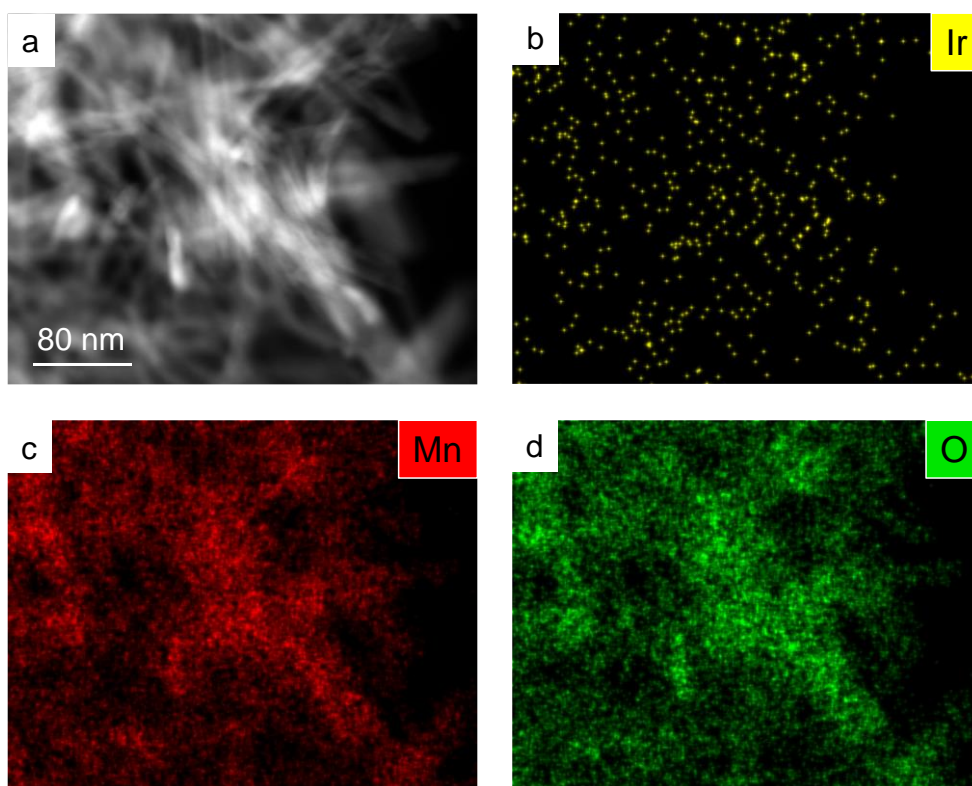

**Supplementary Fig. 6** STEM-EDS mapping images for Ir-MnO<sub>2</sub>.

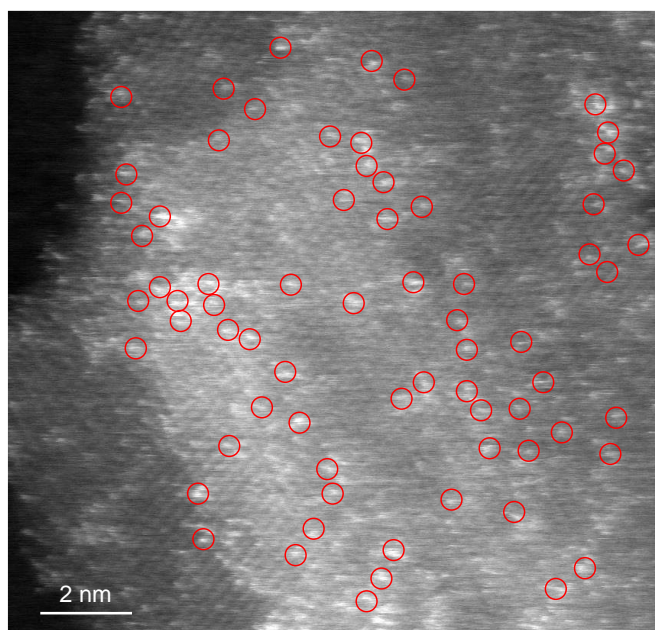

**Supplementary Fig. 7** HAADF-TEM image for Ir-MnO<sub>2</sub> and inset red circles represent Ir sites.



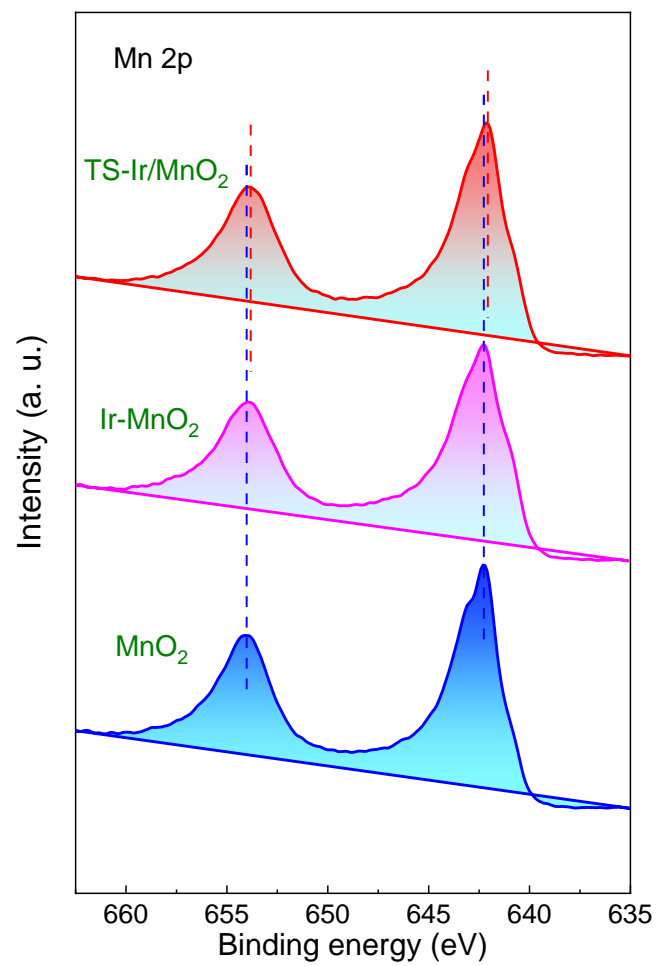

**Supplementary Fig. 8** Mn 2p XPS spectra for MnO<sub>2</sub>, Ir-MnO<sub>2</sub> and TS-Ir/MnO<sub>2</sub>.

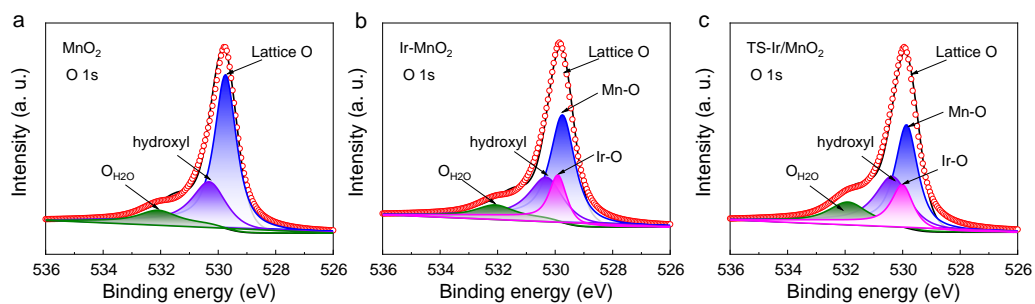

**Supplementary Fig. 9** High-resolution spectra of O 1s for MnO<sub>2</sub> (a), Ir-MnO<sub>2</sub> (b) and TS-Ir/MnO<sub>2</sub> (c).

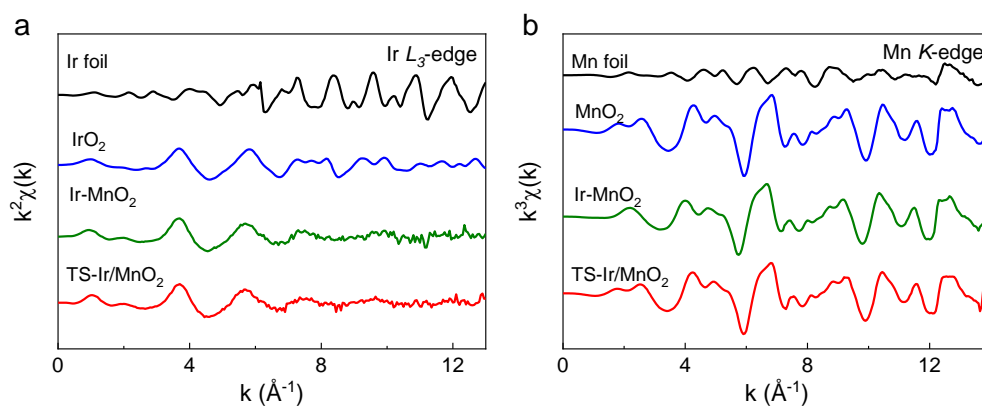

**Supplementary Fig. 10** (a)  $k^2\chi(k)$  curves of Ir  $L_3$ -edge EXAFS oscillation functions for TS-Ir/MnO<sub>2</sub>, Ir-MnO<sub>2</sub>, IrO<sub>2</sub> and Ir foil. (b)  $k^3\chi(k)$  curves of Mn  $K$ -edge EXAFS oscillation functions for TS-Ir/MnO<sub>2</sub>, Ir-MnO<sub>2</sub>, MnO<sub>2</sub> and Mn foil.

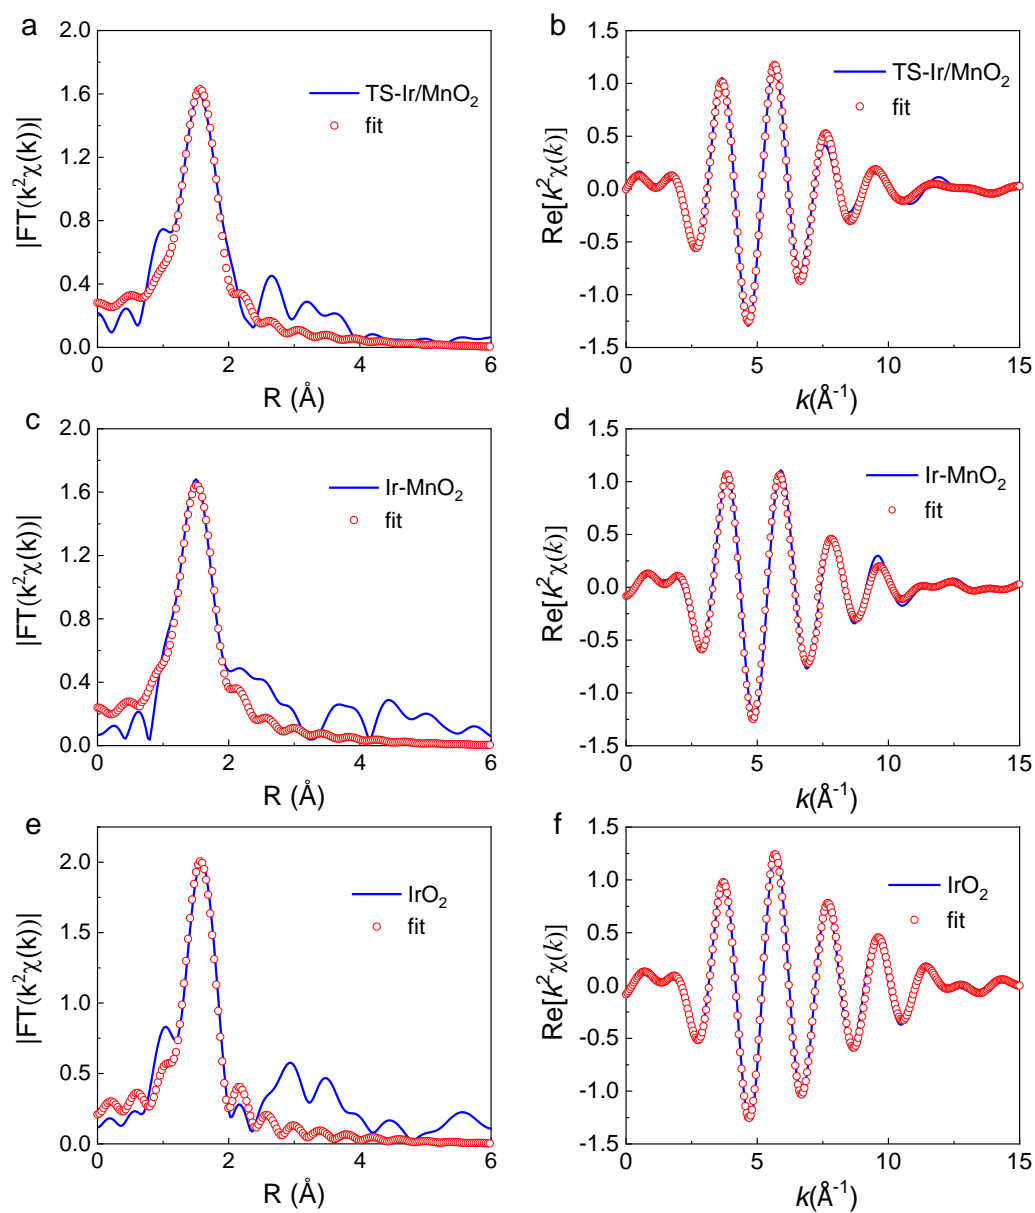

**Supplementary Fig. 11** The fitting curves of  $k^2$ -weighted Ir L<sub>3</sub>-edge EXAFS spectra and corresponding  $k^2$ -weighted FT of Ir L<sub>3</sub>-edge EXAFS oscillation functions for (a, b) TS-Ir/MnO<sub>2</sub>, (c, d) Ir-MnO<sub>2</sub> and (e, f) IrO<sub>2</sub>.

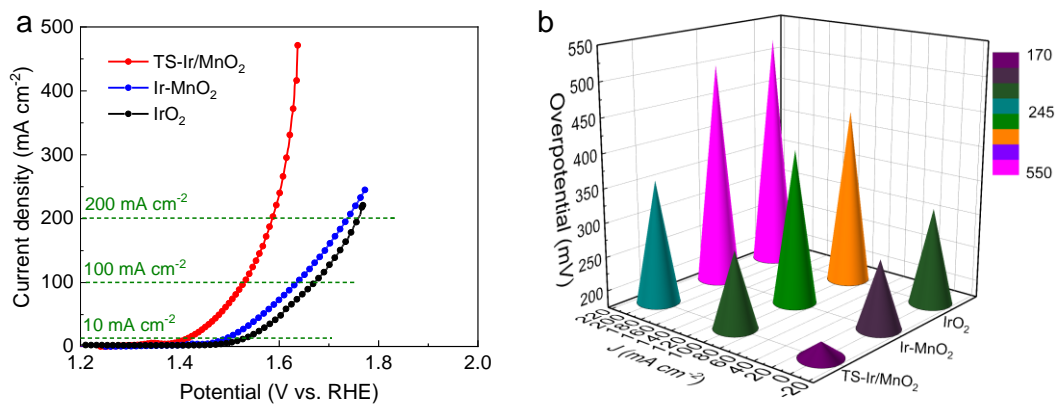

**Supplementary Fig. 12** (a) OER polarization curves of TS-Ir/MnO<sub>2</sub>, Ir-MnO<sub>2</sub>, IrO<sub>2</sub>. (b) The corresponding overpotentials at current densities of 10, 100 and 200 mA cm<sup>-2</sup>.

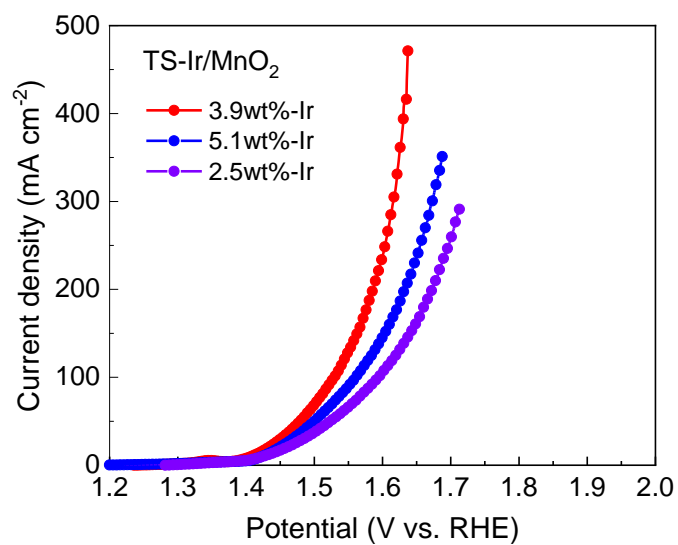

**Supplementary Fig. 13** OER polarization curves of TS-Ir/MnO<sub>2</sub> with different metal loading of Ir.

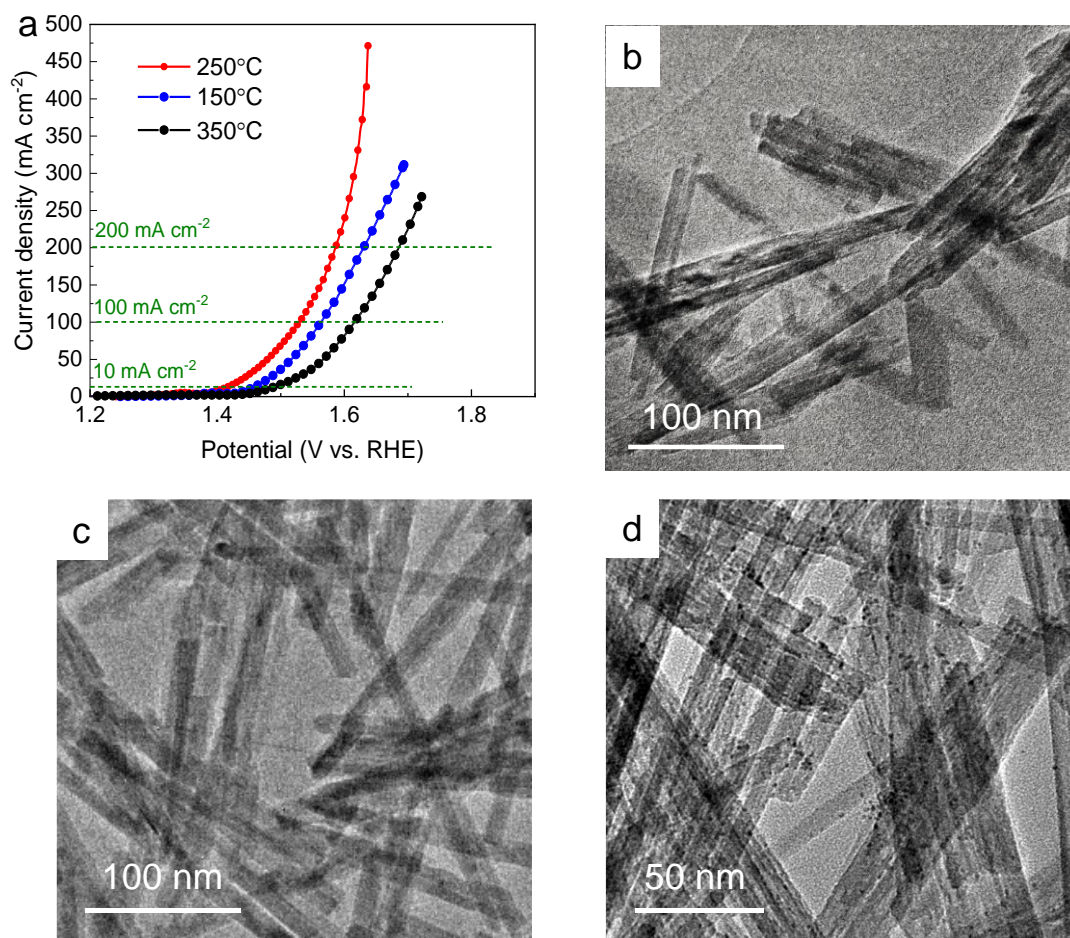

**Supplementary Fig. 14.** (a) Linear sweep voltammetry (LSV) curves for Ir electrocatalysts thermal annealed at 150, 250 and 350 °C. TEM images of Ir-based electrocatalysts annealed at (b) 250 °C, (c) 150 °C and (d) 350 °C.

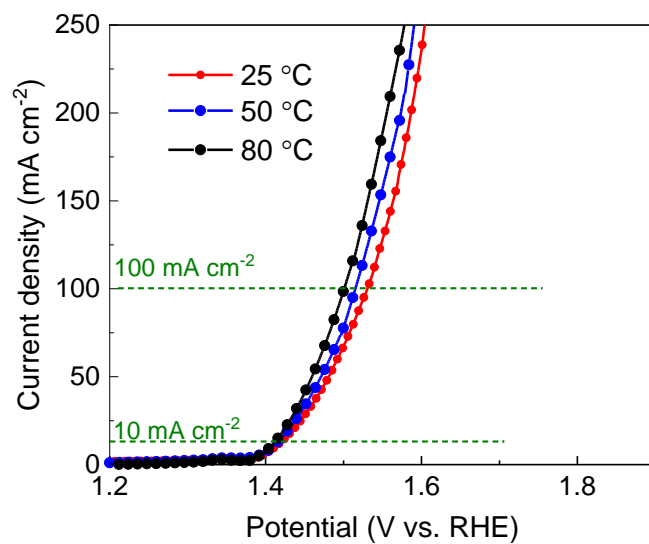

**Supplementary Fig. 15.** Linear sweep voltammetry (LSV) curves of TS-Ir/MnO<sub>2</sub> under 25, 50 and 80 °C in 0.1 M HClO<sub>4</sub>.



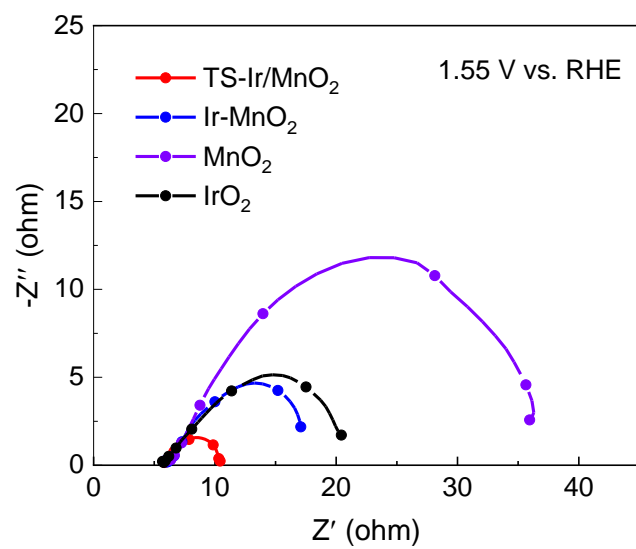

**Supplementary Fig. 16.** Nyquist plots measured at 1.55 V (vs. RHE) of TS-Ir/MnO<sub>2</sub>, Ir-MnO<sub>2</sub>, MnO<sub>2</sub> and IrO<sub>2</sub>.

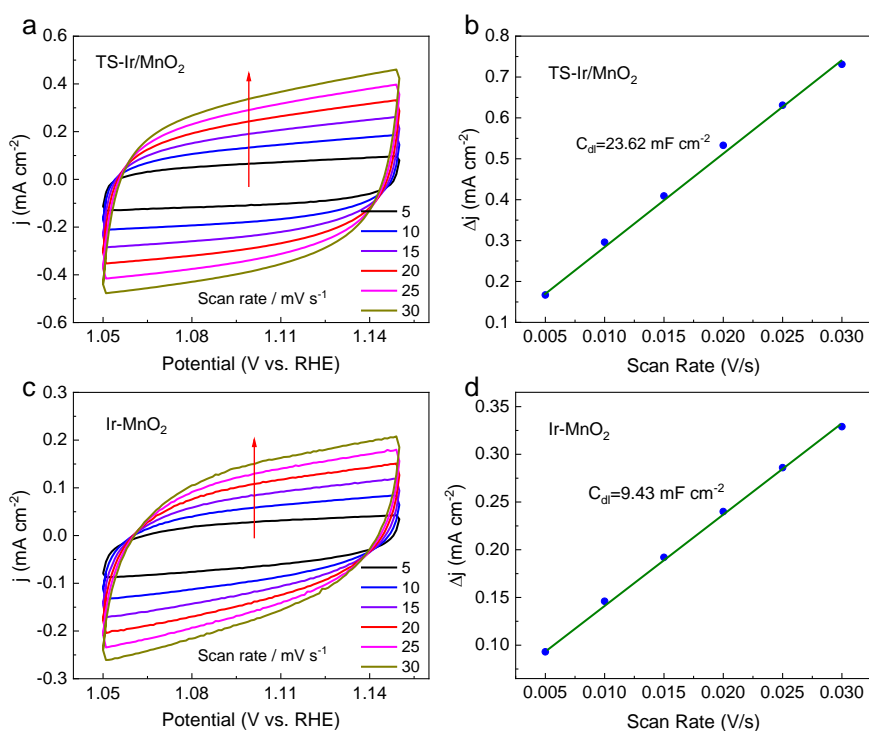

**Supplementary Fig. 17** Double-layer capacitance measurements. (a), (c) CVs were conducted in a non-Faradaic region of voltammogram at the following scan rate: 5, 10, 15, 20, 25 and 30 mV s<sup>-1</sup> for TS-Ir/MnO<sub>2</sub> and Ir-MnO<sub>2</sub>, respectively. (b), (d) The difference in charging currents variation at an underpotential plotted against scan rate for estimation of double-layer capacitance ( $C_{dl}$ ) for TS-Ir/MnO<sub>2</sub> and Ir-MnO<sub>2</sub>, respectively.

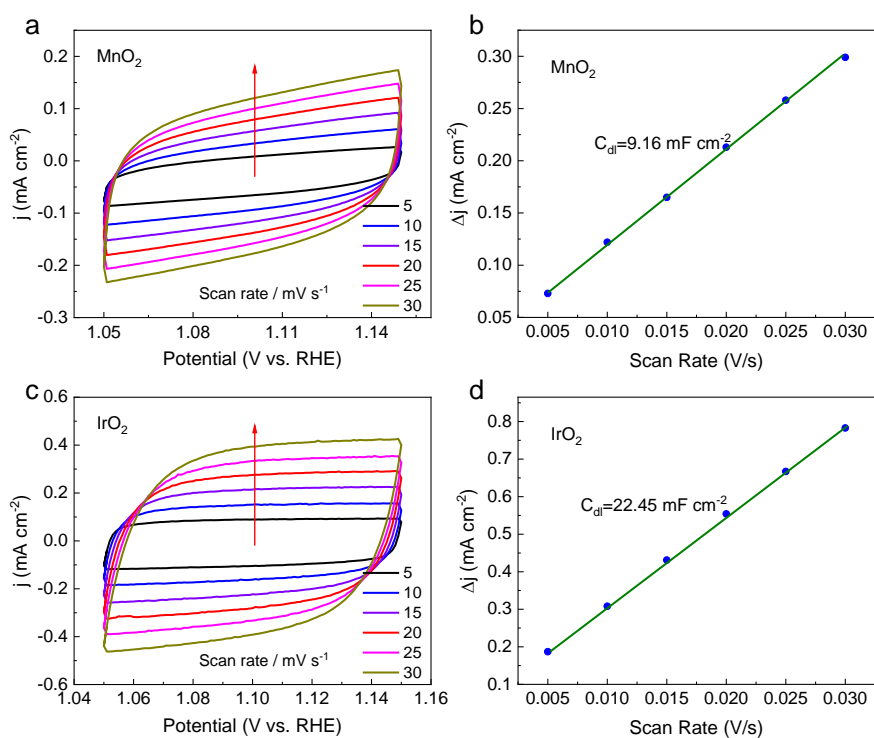

**Supplementary Fig. 18** Double-layer capacitance measurements. (a), (c) CVs were conducted in a non-Faradaic region of voltammogram at the following scan rate: 5, 10, 15, 20, 25 and 30 mV s<sup>-1</sup> for MnO<sub>2</sub> and IrO<sub>2</sub>, respectively. (b), (d) The difference in charging currents variation at an underpotential plotted against scan rate for estimation of double-layer capacitance ( $C_{dl}$ ) for MnO<sub>2</sub> and IrO<sub>2</sub>, respectively.

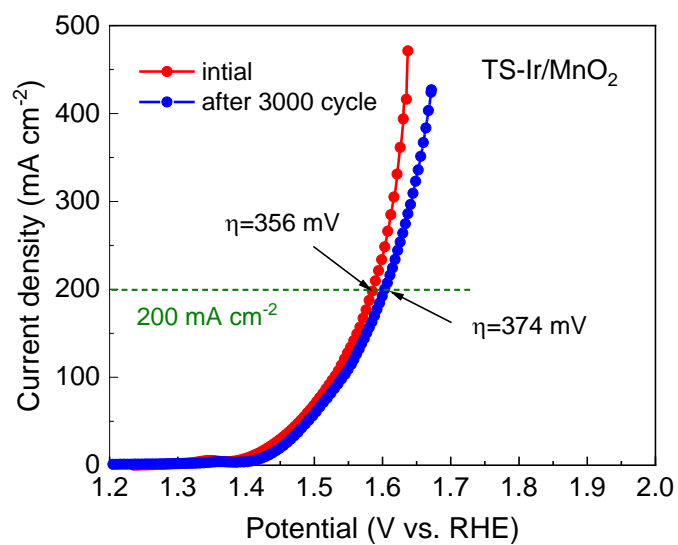

**Supplementary Fig. 19** OER polarization curves of TS-Ir/MnO<sub>2</sub> electrocatalyst before and after 3000 electrochemical test cycles.

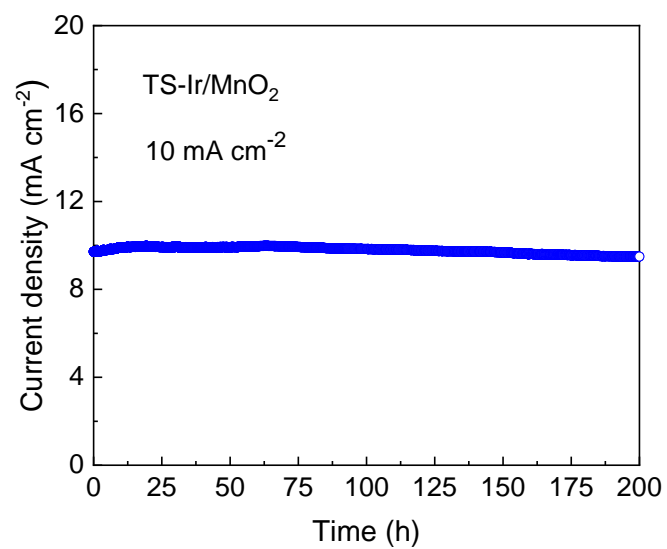

**Supplementary Fig. 20** Chronoamperometry measurement of TS-Ir/MnO<sub>2</sub>.

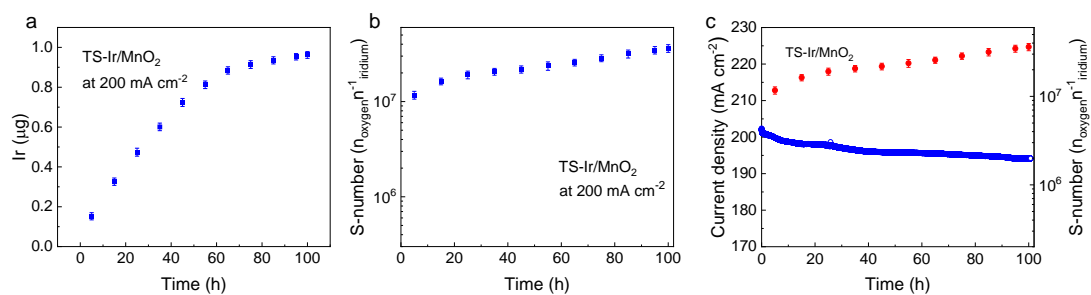

**Supplementary Fig. 21** (a) Dissolved content of metal Ir, (b) the calculated constant S-number under 200 mA cm<sup>-2</sup>. (c) Chronoamperometry measurement and S-number for TS-Ir/MnO<sub>2</sub>.

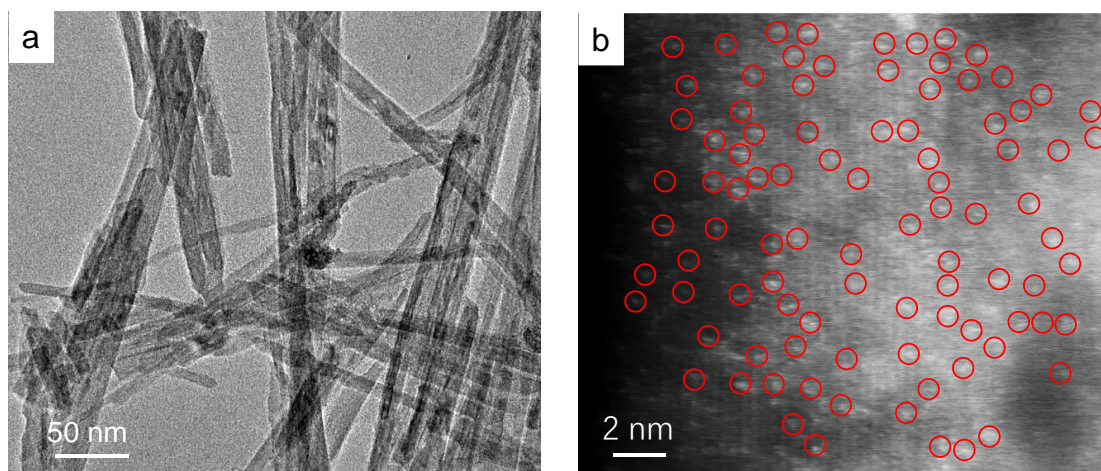

**Supplementary Fig. 22** (a) TEM and (b) HAADF-TEM images for TS-Ir/MnO<sub>2</sub> after electrochemical measurements.

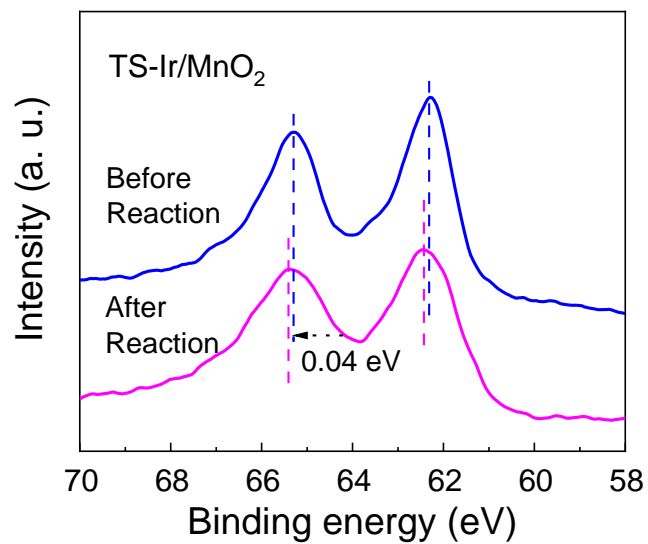

**Supplementary Fig. 23** Ir 4f XPS spectra for TS-Ir/MnO<sub>2</sub> before and after electrochemical measurements.



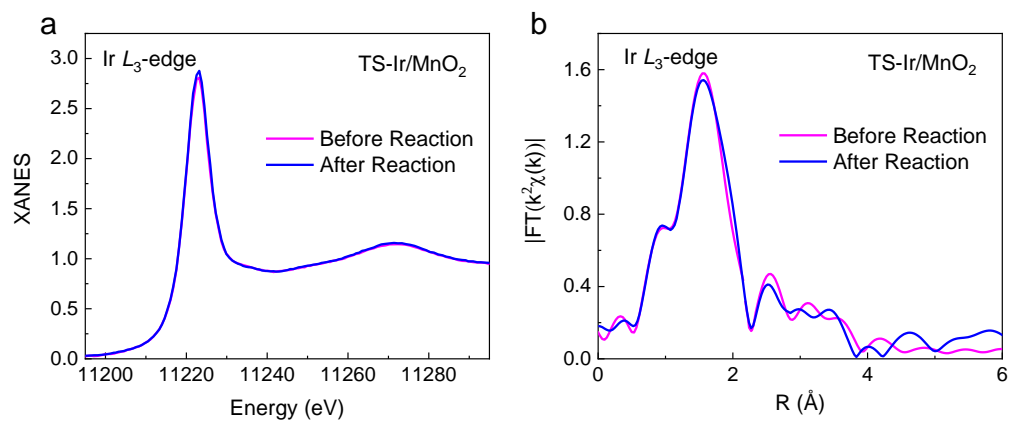

**Supplementary Fig. 24** (a) Ir L<sub>3</sub>-edge XANES spectra and (b) Fourier transforms (FTs) of the Ir L<sub>3</sub>-edge EXAFS oscillations of TS-Ir/MnO<sub>2</sub> before and after electrochemical measurements.

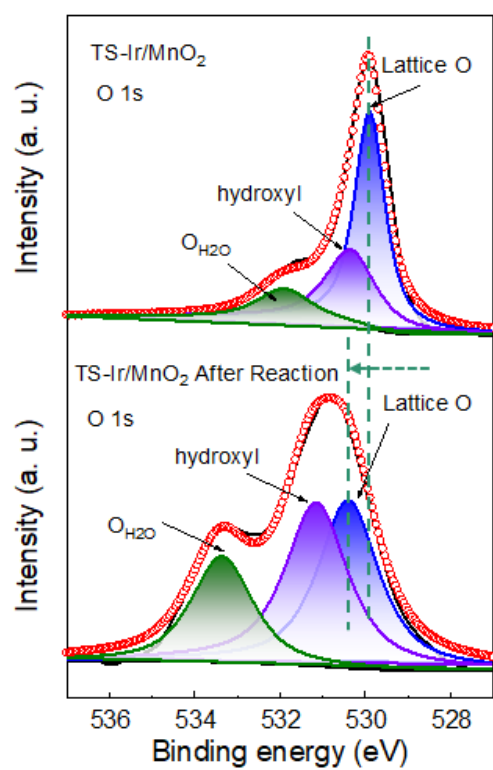

**Supplementary Fig. 25** O 1s XPS spectra for TS-Ir/MnO<sub>2</sub> before and after electrochemical measurements.

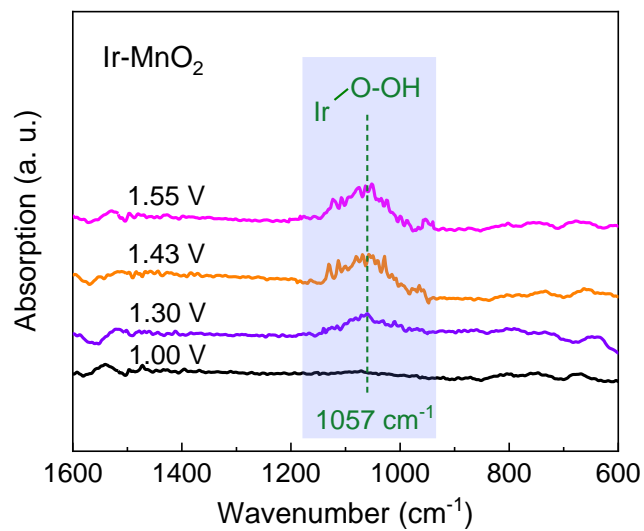

**Supplementary Fig. 26** In situ SRIR spectroscopy measurements of Ir-MnO<sub>2</sub> at various potentials.

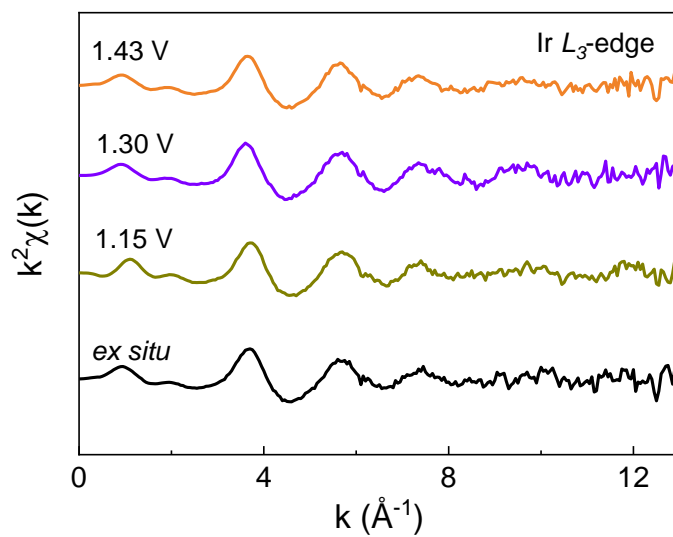

**Supplementary Fig. 27**  $k^2\chi(k)$  curves of Ir L<sub>3</sub>-edge EXAFS oscillation functions for TS-Ir/MnO<sub>2</sub> under different applied potentials.

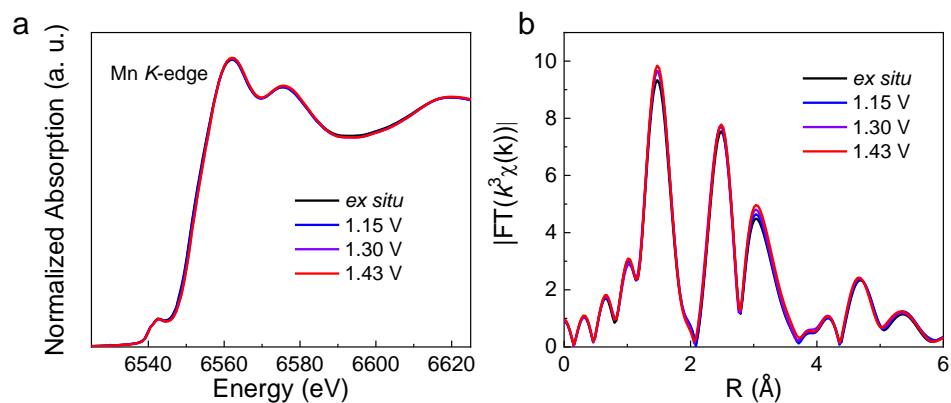

**Supplementary Fig. 28** (a) Mn K-edge XANES spectra and (b) Fourier transforms (FTs) of the Mn K-edge EXAFS oscillations of TS-Ir/MnO<sub>2</sub> under different applied potentials.

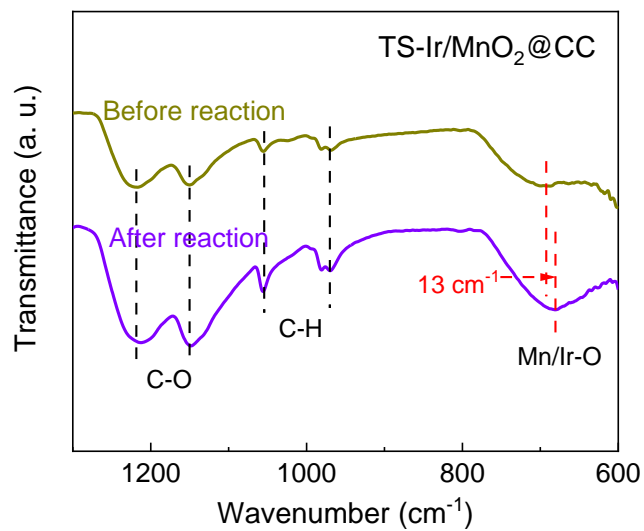

**Supplementary Fig. 29** The FTIR image of TS-Ir/MnO<sub>2</sub>@CC before and after isotopically labelled OER measurements.

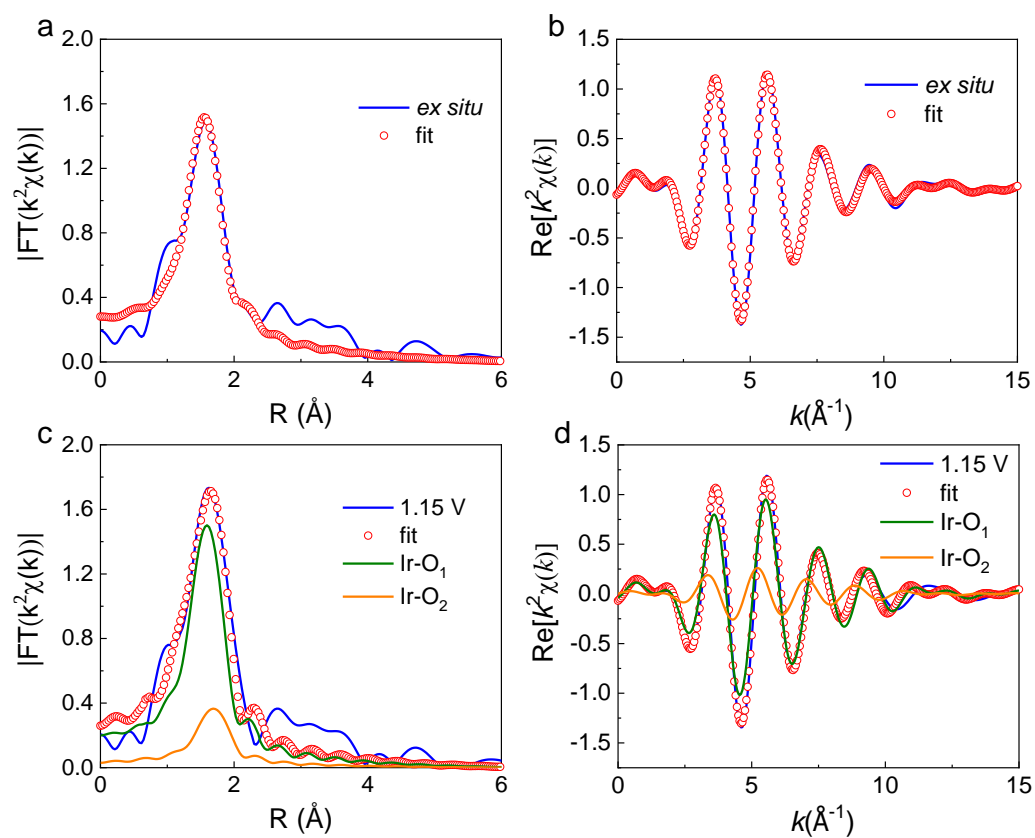

**Supplementary Fig. 30** In situ XAFS measurements for TS-Ir/MnO<sub>2</sub>. The fitting curves of  $k^2$ -weighted EXAFS spectra and the  $Re(k^2\chi(k))$  oscillation curves under ex situ conditions (a and b) and 1.15 V conditions (c and d).

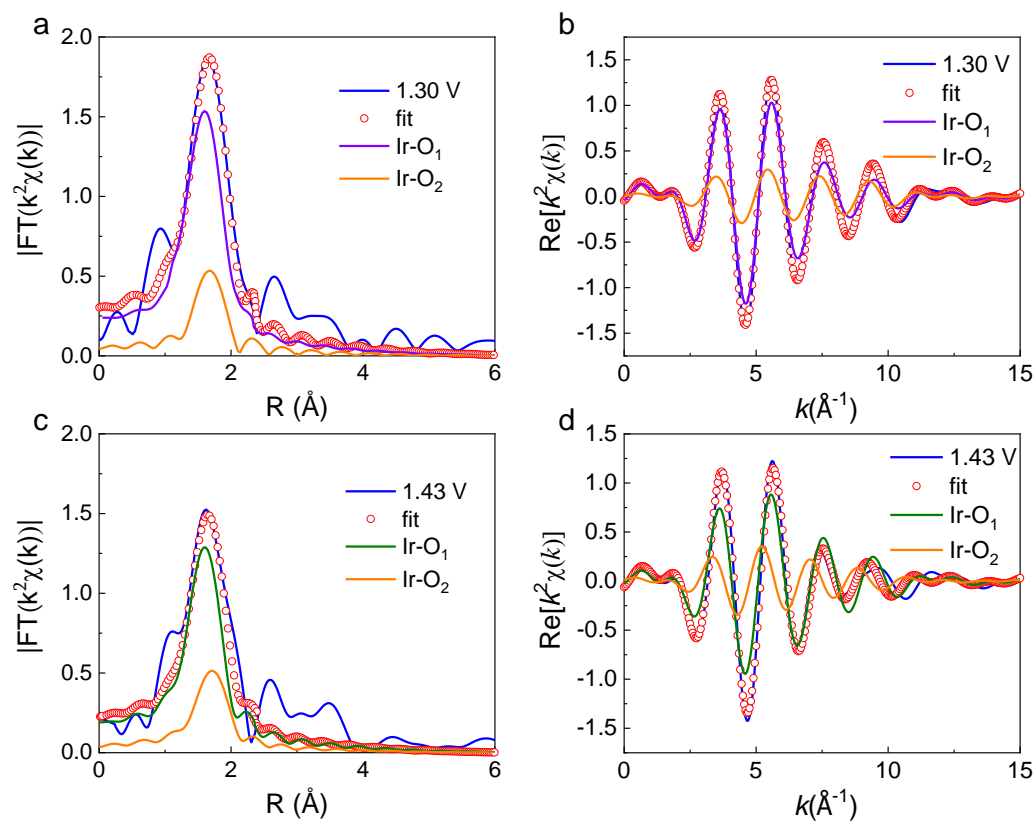

**Supplementary Fig. 31 In situ XAFS measurements for TS-Ir/MnO<sub>2</sub>.** The fitting curves of  $k^2$ -weighted EXAFS spectra and the  $\text{Re}(k^2\chi(k))$  oscillation curves under 1.30 V conditions (a and b) and 1.43 V conditions (c and d).



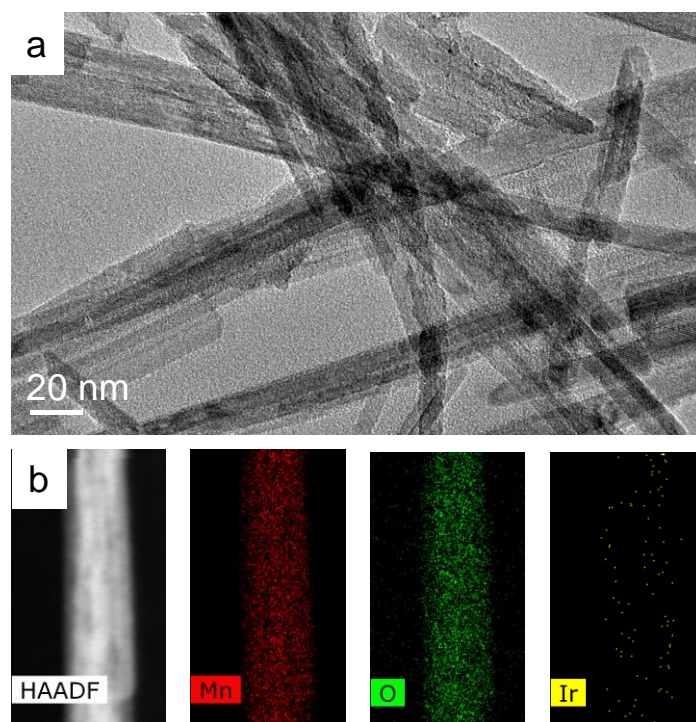

**Supplementary Fig. 32** (a) TEM image and (b) STEM-EDS mapping images for TS-Ir/MnO<sub>2</sub> after the PEM electrolyser device test.

**Supplementary Table 1.** The apparent bond length of Ir–O/Mn–O in all samples.

| Sample                 | Apparent bond length (Ir–O) | Apparent bond length (Mn–O) |
|------------------------|-----------------------------|-----------------------------|
| TS-Ir/MnO <sub>2</sub> | 1.54 Å                      | 1.50 Å                      |
| Ir-MnO <sub>2</sub>    | 1.48 Å                      | 1.47 Å                      |
| MnO <sub>2</sub>       | --                          | 1.47 Å                      |
| IrO <sub>2</sub>       | 1.60 Å                      | --                          |

**Supplementary Table 2** Structural parameters for TS-Ir/MnO<sub>2</sub>, Ir-MnO<sub>2</sub> and IrO<sub>2</sub> electrocatalysts extracted from quantitative EXAFS curve-fitting using the ARTEMIS module of IFEFFIT.

| Sample                 | Path | N       | R (Å)      | $\sigma^2(10^{-3}\text{Å}^2)$ | $\Delta E_0(\text{eV})$ | R-factor |
|------------------------|------|---------|------------|-------------------------------|-------------------------|----------|
| TS-Ir/MnO <sub>2</sub> | Ir-O | 4.2±0.3 | 1.94±0.005 | 3.6±0.5                       | 9.7±1.3                 | 0.005    |
| Ir-MnO <sub>2</sub>    | Ir-O | 4.1±0.2 | 1.89±0.01  | 5.1±1.1                       | 9.8±2.1                 | 0.005    |
| IrO <sub>2</sub>       | Ir-O | 6       | 2.01±0.01  | 3.3±0.5                       | 9.7±1.6                 | 0.003    |

N, coordination number; R, bond length;  $\sigma^2$  Debye-Waller factor;  $\Delta E_0$  inner potential shift.

**Supplementary Table 3.** Comparison of OER activity of TS-Ir/MnO<sub>2</sub> electrocatalyst with other recently reported catalysts in acid solution according to catalytic kinetic parameter (Tafel slope).<sup>1-11</sup>

| Catalyst                                                                  | Electrolyte                          | Support      | Tafel slope (mV dec <sup>-1</sup> ) | Ref.      |
|---------------------------------------------------------------------------|--------------------------------------|--------------|-------------------------------------|-----------|
| TS-Ir/MnO <sub>2</sub>                                                    | 0.1 M HClO <sub>4</sub>              | Carbon cloth | 56.6                                | This work |
| Ir-MnO <sub>2</sub>                                                       | 0.1 M HClO <sub>4</sub>              | Carbon cloth | 101.2                               | This work |
| IrMnOF@Ir                                                                 | 0.1 M HClO <sub>4</sub>              | Carbon paper | 58.3                                | [1]       |
| Ir/δ-MnO <sub>2</sub>                                                     | 0.5 M H <sub>2</sub> SO <sub>4</sub> | Carbon Paper | 123                                 | [2]       |
| (Mn <sub>0.8</sub> Ir <sub>0.2</sub> )O <sub>2</sub> ·10F                 | 0.5 M H <sub>2</sub> SO <sub>4</sub> | Ti-foils     | 38                                  | [3]       |
| IrO <sub>x</sub> /Zr <sub>2</sub> ON <sub>2</sub>                         | 0.5 M H <sub>2</sub> SO <sub>4</sub> | RDE          | 48                                  | [4]       |
| GB-Ta <sub>0.1</sub> Tm <sub>0.1</sub> Ir <sub>0.8</sub> O <sub>2-δ</sub> | 0.5 M H <sub>2</sub> SO <sub>4</sub> | RDE (Au)     | 64                                  | [5]       |
| IrO <sub>2</sub> /GCN                                                     | 0.5 M H <sub>2</sub> SO <sub>4</sub> | RDE          | 57                                  | [6]       |
| 12Ru/MnO <sub>2</sub>                                                     | 0.1 M HClO <sub>4</sub>              | GCE          | 29.4                                | [7]       |
| H/d-MnO <sub>x</sub> /RuO <sub>2</sub>                                    | 0.5 M H <sub>2</sub> SO <sub>4</sub> | GCE          | 43.8                                | [8]       |
| Li <sub>0.52</sub> RuO <sub>2</sub>                                       | 0.5 M H <sub>2</sub> SO <sub>4</sub> | GCE          | 83.3                                | [9]       |
| 90-Co-MnO <sub>2</sub>                                                    | 0.1 M HClO <sub>4</sub>              | GCE          | 158                                 | [10]      |
| IrO <sub>2</sub> /a-MnO <sub>2</sub>                                      | 0.1 M HClO <sub>4</sub>              | GCE          | 74                                  | [11]      |

Note: RDE, rotating disk electrode; GCE, glassy carbon electrode

**Supplementary Table 4.** The calculated  $C_{dl}$ , ECSA and  $R_F$  for TS-Ir/MnO<sub>2</sub>, Ir-MnO<sub>2</sub>, MnO<sub>2</sub> and IrO<sub>2</sub>.

|                                 | TS-Ir/MnO <sub>2</sub> | Ir-MnO <sub>2</sub> | MnO <sub>2</sub> | IrO <sub>2</sub> |
|---------------------------------|------------------------|---------------------|------------------|------------------|
| $C_{dl}$ (mF cm <sup>-2</sup> ) | 23.62                  | 9.43                | 9.16             | 22.45            |
| ECSA                            | 674.86                 | 269.43              | 261.71           | 641.43           |
| $R_F$                           | 674.86                 | 269.43              | 261.71           | 641.43           |

**Supplementary Table 5.** Comparison of OER activity of TS-Ir/MnO<sub>2</sub> electrocatalyst with other recently reported catalysts in acid solution. <sup>12-20</sup>

| Catalyst                                                                     | Electrolyte                             | Support            | $\eta$ At 10 mA<br>cm <sup>-2</sup> | $\eta$ At 250 mA<br>cm <sup>-2</sup> | Mass activity (A<br>g <sub>metal</sub> <sup>-1</sup> ) | Ref.         |
|------------------------------------------------------------------------------|-----------------------------------------|--------------------|-------------------------------------|--------------------------------------|--------------------------------------------------------|--------------|
| TS-Ir/MnO <sub>2</sub>                                                       | 0.1 M<br>HClO <sub>4</sub>              | Carbon<br>cloth    | 198                                 | 356                                  | 1025 at 198 mV                                         | This<br>work |
|                                                                              |                                         |                    |                                     |                                      | 7816 at 260 mV                                         |              |
| Ir-MnO <sub>2</sub>                                                          | 0.1 M<br>HClO <sub>4</sub>              | Carbon<br>cloth    | 275                                 | 502                                  | 54 at 198 mV                                           | This<br>work |
|                                                                              |                                         |                    |                                     |                                      | 2366 at 260 mV                                         |              |
| Ir <sub>0.06</sub> Co <sub>2.94</sub> O <sub>4</sub>                         | 0.1 M<br>HClO <sub>4</sub>              | Au<br>electrode    | 292                                 | --                                   | 2511 at 300 mV                                         | [12]         |
| SS Pt-RuO <sub>2</sub><br>HNSs                                               | 0.5 M<br>H <sub>2</sub> SO <sub>4</sub> | GCE                | 228                                 | 282 (100 mA<br>cm <sup>-2</sup> )    | --                                                     | [13]         |
| Ru <sub>1</sub> -Pt <sub>3</sub> Cu                                          | 0.1 M<br>HClO <sub>4</sub>              | RDE (GC)           | 280                                 | --                                   | 779 at 250 mV                                          | [14]         |
| IrO <sub>x</sub> /SrIrO <sub>3</sub>                                         | 0.5 M<br>H <sub>2</sub> SO <sub>4</sub> | SrTiO <sub>3</sub> | 270-290                             | --                                   | --                                                     | [15]         |
| IrO <sub>x</sub> /9r-BaIrO <sub>3</sub>                                      | 0.5 M<br>H <sub>2</sub> SO <sub>4</sub> | GCE                | 230                                 | --                                   | 168 at 230 mV                                          | [16]         |
| Ru <sub>1</sub> Ir <sub>1</sub> O <sub>x</sub>                               | 0.5 M<br>H <sub>2</sub> SO <sub>4</sub> | Ti-plates          | 204                                 | 300* (120 mA<br>cm <sup>-2</sup> )   | 1124 at 300 mV                                         | [17]         |
| GB-Ta <sub>0.1</sub> Tm <sub>0.1</sub><br>Ir <sub>0.8</sub> O <sub>2-6</sub> | 0.5 M<br>H <sub>2</sub> SO <sub>4</sub> | RDE (Au)           | 198                                 | 260* (100 mA<br>cm <sup>-2</sup> )   | 3126 at 266 mV                                         | [5]          |
| Mn <sub>0.73</sub> Ru <sub>0.27</sub><br>O <sub>2-8</sub>                    | 0.5 M<br>H <sub>2</sub> SO <sub>4</sub> | GCE                | 208                                 | --                                   | 879 at 270 mV                                          | [18]         |
| 12Ru/MnO <sub>2</sub>                                                        | 0.1 M<br>HClO <sub>4</sub>              | GCE                | 161                                 | --                                   | 1264 at 165 mV                                         | [7]          |
| NaRuO <sub>2</sub>                                                           | 0.1 M<br>HClO <sub>4</sub>              | Ti-plates          | 225                                 | --                                   | 42 at 250 mV                                           | [19]         |
| Li-IrO <sub>x</sub>                                                          | 0.5 M<br>H <sub>2</sub> SO <sub>4</sub> | RDE                | 270                                 | --                                   | 100 at 290 mV                                          | [20]         |

\*Data are not specifically reported in the article, obtained from the LSV curves.

Note: GCE, glassy carbon electrode; DRE, rotating disk electrode

**Supplementary Table 6.** The apparent bond length of Ir–O in TS-Ir/MnO<sub>2</sub> under different working conditions.

| Sample  | Apparent bond length (Ir–O) |
|---------|-----------------------------|
| ex situ | 1.54 Å                      |
| 1.15 V  | 1.59 Å                      |
| 1.30 V  | 1.59 Å                      |
| 1.45 V  | 1.59 Å                      |

**Supplementary Table 7.** Structural parameters for TS-Ir/MnO<sub>2</sub> electrocatalyst under different potentials extracted from quantitative EXAFS curve-fitting using the ARTEMIS module of IFEFFIT.

| Sample  | Path              | N       | R (Å)     | $\sigma^2(10^{-3}\text{Å}^2)$ | $\Delta E_0(\text{eV})$ | R-factor |
|---------|-------------------|---------|-----------|-------------------------------|-------------------------|----------|
| ex situ | Ir-O              | 4.3±0.3 | 1.94±0.01 | 5.6±0.5                       | 9.9±1.5                 | 0.004    |
| 1.15V   | Ir-O              | 4.3±0.2 | 1.96±0.01 | 5.9±0.5                       | 9.7                     | 0.006    |
|         | Ir-O <sub>2</sub> | 1.1±0.2 | 2.08±0.01 | 3.6±0.3                       |                         |          |
| 1.30V   | Ir-O <sub>1</sub> | 4.2±0.2 | 1.96      | 5.5±0.8                       | 9.7                     | 0.003    |
|         | Ir-O <sub>2</sub> | 1.3±0.2 | 2.08±0.01 | 3.2±0.2                       |                         |          |
| 1.43V   | Ir-O <sub>1</sub> | 3.3±0.2 | 1.96      | 5.2±1.2                       | 9.7                     | 0.005    |
|         | Ir-O <sub>2</sub> | 1.2±0.2 | 2.07±0.01 | 3.4±0.8                       |                         |          |

N, coordination number; R, bond length;  $\sigma^2$  Debye-Waller factor;  $\Delta E_0$  inner potential shift



## Reference

- 1 Xu, Z. *et al.* Light-driven orderly assembly of Ir-atomic chains to integrate a dynamic reaction pathway for acidic oxygen evolution. *Angew. Chem. Int. Ed.* **62**, e202301128 (2023).
- 2 Kakati, U. *et al.* Iridium incorporation into MnO<sub>2</sub> for an enhanced electrocatalytic oxygen evolution reaction. *ChemCatChem* **15**, e202201549 (2023).
- 3 Ghadge, S. D. *et al.* Experimental and theoretical validation of high efficiency and robust electrocatalytic response of one-dimensional (1D)(Mn, Ir) O<sub>2</sub>: 10F nanorods for the oxygen evolution reaction in PEM-based water electrolysis. *ACS Catal.* **9**, 2134-2157 (2019).
- 4 Lee, C. *et al.* Catalyst-support interactions in Zr<sub>2</sub>ON<sub>2</sub>-Supported IrO<sub>x</sub> electrocatalysts to break the trade-off relationship between the activity and stability in the acidic oxygen evolution reaction. *Adv. Fun. Mater.* **33**, 2301557 (2023).
- 5 Hao, S. *et al.* Torsion strained iridium oxide for efficient acidic water oxidation in proton exchange membrane electrolyzers. *Nat. Nanotechno.* **16**, 1371-1377 (2021).
- 6 Chen, J. *et al.* Low-coordinate iridium oxide confined on graphitic carbon nitride for highly efficient oxygen evolution. *Angew. Chem. Int. Ed.* **58**, 12540-12544 (2019).
- 7 Lin, C. *et al.* In-situ reconstructed Ru atom array on  $\alpha$ -MnO<sub>2</sub> with enhanced performance for acidic water oxidation. *Nat. Catal.* **4**, 1012-1023 (2021).
- 8 Wu, Z. *et al.* Hexagonal defect-rich MnO<sub>x</sub>/RuO<sub>2</sub> with abundant heterointerface to modulate electronic structure for acidic oxygen evolution reaction. *Adv. Fun. Mater.* 2307010.
- 9 Qin, Y. *et al.* RuO<sub>2</sub> electronic structure and lattice strain dual engineering for enhanced acidic oxygen evolution reaction performance. *Nat. Commun.* **13**, 3784 (2022).
- 10 Zhang, X., Feng, C., Dong, B., Liu, C. & Chai, Y. High-voltage-enabled stable cobalt species deposition on MnO<sub>2</sub> for water oxidation in acid. *Adv. Mater.* e2207066 (2023).
- 11 Wang, Z. *et al.* Influence of the MnO<sub>2</sub> phase on oxygen evolution reaction performance for low-loading iridium electrocatalysts. *ChemElectroChem* **8**, 418-424 (2021).
- 12 Shan, J. *et al.* Short-range ordered iridium single atoms integrated into cobalt oxide spinel structure for highly efficient electrocatalytic water oxidation. *J. Am. Chem. Soc.* **143**, 5201-5211 (2021).
- 13 Wang, J. *et al.* Single-site Pt-doped RuO<sub>2</sub> hollow nanospheres with interstitial C for high-performance acidic overall water splitting. *Sci. Adv.* **8**, eabl9271 (2022).
- 14 Yao, Y. *et al.* Engineering the electronic structure of single atom Ru sites via compressive strain boosts acidic water oxidation electrocatalysis. *Nat. Catal.* **2**, 304-313 (2019).
- 15 Seitz, L. C. *et al.* A highly active and stable IrO<sub>x</sub>/SrIrO<sub>3</sub> catalyst for the oxygen evolution reaction. *Science* **353**, 1011-1014 (2016).
- 16 Li, N. *et al.* Identification of the active-layer structures for acidic oxygen evolution from 9R-BaIrO<sub>3</sub> electrocatalyst with enhanced iridium mass activity. *J. Am. Chem. Soc.* **143**, 18001-18009 (2021).
- 17 He, J., Zhou, X., Xu, P. & Sun, J. Regulating electron redistribution of intermetallic iridium oxide by incorporating Ru for efficient acidic water oxidation. *Adv. Energy*

- Mater.* **11**, 2102883 (2021).
- 18 Wang, K. *et al.* Highly active ruthenium sites stabilized by modulating electron-feeding for sustainable acidic oxygen-evolution electrocatalysis. *Energy Environ. Sci.* **15**, 2356-2365 (2022).
- 19 Laha, S. *et al.* Ruthenium oxide nanosheets for enhanced oxygen evolution catalysis in acidic medium. *Adv. Energy Mater.* **9**, 1803795 (2019).
- 20 Gao, J. *et al.* Breaking long-range order in iridium oxide by alkali ion for efficient water oxidation. *J. Am. Chem. Soc.* **141**, 3014-3023 (2019).
